# Supplementary material for: Influence of Vitamin D Status and Supplementation on Metabolomic Profiles of Older Adults
Source: MDPI journal article supplement (doi:10.3390/metabo13020166), 2023-01-23
Supplement: s1 [file s1]

**Supplementary Table 1.** Metabolites measured and quantified in baseline serum samples

| Metabolite Class | Metabolite (μM)        | Mean    | SE    |
|------------------|------------------------|---------|-------|
| Amino acid       | Glycine                | 211.217 | 5.788 |
| Amino acid       | Alanine                | 363.096 | 7.359 |
| Amino acid       | Serine                 | 102.546 | 1.835 |
| Amino acid       | Proline                | 147.777 | 4.580 |
| Amino acid       | Valine                 | 214.145 | 3.737 |
| Amino acid       | Threonine              | 99.557  | 2.435 |
| Amino acid       | Citrulline             | 34.110  | 0.954 |
| Amino acid       | Tyrosine               | 77.135  | 1.658 |
| Amino acid       | Tryptophan             | 54.061  | 1.010 |
| Amino acid       | Leucine                | 111.354 | 2.511 |
| Amino acid       | Isoleucine             | 59.022  | 1.401 |
| Amino acid       | Asparagine             | 45.574  | 0.732 |
| Amino acid       | Aspartic acid          | 8.764   | 0.211 |
| Amino acid       | Glutamine              | 574.337 | 7.879 |
| Amino acid       | Glutamic acid          | 39.864  | 2.473 |
| Amino acid       | Methionine             | 22.018  | 0.369 |
| Amino acid       | Histidine              | 78.219  | 0.888 |
| Amino acid       | Ornithine              | 62.427  | 1.244 |
| Amino acid       | Lysine                 | 206.217 | 3.208 |
| Amino acid       | Phenylalanine          | 62.081  | 0.862 |
| Amino acid       | Methionine-sulfoxide   | 0.747   | 0.016 |
| Amino acid       | Arginine               | 108.319 | 1.869 |
| Amino acid       | Homocysteine           | 8.058   | 0.111 |
| Biogenic Amine   | Acetyl-ornithine       | 0.996   | 0.089 |
| Biogenic Amine   | Putrescine             | 0.147   | 0.005 |
| Biogenic Amine   | alpha-Aminoadipic acid | 1.240   | 0.024 |
| Biogenic Amine   | Taurine                | 66.405  | 2.030 |
| Biogenic Amine   | trans-Hydroxyproline   | 7.582   | 0.356 |
| Biogenic Amine   | Creatinine             | 71.029  | 1.459 |

|                     |                             |           |        |
|---------------------|-----------------------------|-----------|--------|
| Biogenic Amine      | Serotonin                   | 0.950     | 0.053  |
| Biogenic Amine      | Asymmetric dimethylarginine | 0.449     | 0.009  |
| Biogenic Amine      | Total dimethylarginine      | 1.272     | 0.023  |
| Biogenic Amine      | Kynurenine                  | 2.448     | 0.069  |
| Biogenic Amine      | Spermidine                  | 0.241     | 0.003  |
| Biogenic Amine      | Spermine                    | 0.174     | 0.002  |
| Biogenic Amine      | Sarcosine                   | 0.943     | 0.052  |
| Fatty Acid          | Butyric acid                | 0.926     | 0.035  |
| Fatty Acid          | Propionic acid              | 0.899     | 0.025  |
| Fatty Acid          | Isobutyric acid             | 1.146     | 0.035  |
| Organic Acid        | Lactic acid                 | 1,530.651 | 48.528 |
| Organic Acid        | beta-Hydroxybutyric acid    | 93.374    | 10.195 |
| Organic Acid        | alpha-Ketoglutaric acid     | 8.322     | 0.183  |
| Organic Acid        | Citric acid                 | 107.836   | 3.257  |
| Organic Acid        | HPPHA                       | 0.144     | 0.018  |
| Organic Acid        | p-Hydroxyhippuric acid      | 0.067     | 0.006  |
| Organic Acid        | Succinic acid               | 1.944     | 0.071  |
| Organic Acid        | Fumaric acid                | 1.189     | 0.043  |
| Organic Acid        | Pyruvic acid                | 42.049    | 2.075  |
| Organic Acid        | Hippuric acid               | 6.603     | 0.530  |
| Organic Acid        | Methylmalonic acid          | 0.164     | 0.012  |
| Organic Acid        | Homovanillic acid           | 0.047     | 0.002  |
| Organic Acid        | Indole acetic acid          | 1.934     | 0.132  |
| Organic Acid        | Uric acid                   | 283.217   | 7.316  |
| Other               | Creatine                    | 24.068    | 1.242  |
| Other               | Betaine                     | 35.324    | 0.980  |
| Other               | Choline                     | 9.446     | 0.214  |
| Other               | Trimethylamine N-oxide      | 6.822     | 1.133  |
| Other               | Methylhistidine             | 11.152    | 0.856  |
| Other               | Glucose                     | 4,780.222 | 73.357 |
| Glycerophospholipid | LYSOC14:0                   | 4.156     | 0.118  |
| Glycerophospholipid | LYSOC16:1                   | 1.729     | 0.055  |

|                     |           |         |       |
|---------------------|-----------|---------|-------|
| Glycerophospholipid | LYSOC16:0 | 51.435  | 1.264 |
| Glycerophospholipid | LYSOC17:0 | 1.002   | 0.033 |
| Glycerophospholipid | LYSOC18:2 | 19.399  | 0.811 |
| Glycerophospholipid | LYSOC18:1 | 13.533  | 0.430 |
| Glycerophospholipid | LYSOC18:0 | 14.742  | 0.429 |
| Glycerophospholipid | LYSOC20:4 | 3.269   | 0.125 |
| Glycerophospholipid | LYSOC20:3 | 0.869   | 0.045 |
| Glycerophospholipid | LYSOC24:0 | 0.086   | 0.002 |
| Glycerophospholipid | LYSOC26:1 | 0.077   | 0.002 |
| Glycerophospholipid | LYSOC26:0 | 0.492   | 0.015 |
| Glycerophospholipid | LYSOC28:1 | 0.304   | 0.011 |
| Glycerophospholipid | LYSOC28:0 | 0.532   | 0.016 |
| Glycerophospholipid | 14:1SMOH  | 6.887   | 0.194 |
| Glycerophospholipid | 16:1SM    | 16.340  | 0.397 |
| Glycerophospholipid | 16:0SM    | 110.123 | 2.365 |
| Glycerophospholipid | 16:1SMOH  | 4.169   | 0.110 |
| Glycerophospholipid | 18:1SM    | 10.988  | 0.299 |
| Glycerophospholipid | PC32:2AA  | 6.192   | 0.178 |
| Glycerophospholipid | 18:0SM    | 25.214  | 0.602 |
| Glycerophospholipid | 20:2SM    | 0.661   | 0.020 |
| Glycerophospholipid | PC36:0AE  | 1.446   | 0.036 |
| Glycerophospholipid | PC36:6AA  | 1.013   | 0.042 |
| Glycerophospholipid | PC36:0AA  | 6.973   | 0.165 |
| Glycerophospholipid | 22:2SMOH  | 14.306  | 0.362 |
| Glycerophospholipid | 22:1SMOH  | 16.090  | 0.361 |
| Glycerophospholipid | PC38:6AA  | 74.907  | 2.832 |
| Glycerophospholipid | PC38:0AA  | 3.242   | 0.111 |
| Glycerophospholipid | PC40:6AE  | 4.311   | 0.152 |
| Glycerophospholipid | 24:1SMOH  | 2.775   | 0.064 |
| Glycerophospholipid | PC40:6AA  | 19.714  | 0.749 |
| Glycerophospholipid | PC40:2AA  | 0.433   | 0.014 |
| Glycerophospholipid | PC40:1AA  | 0.316   | 0.011 |

|               |                                            |        |       |
|---------------|--------------------------------------------|--------|-------|
| Acylcarnitine | C0 (Carnitine)                             | 35.751 | 0.899 |
| Acylcarnitine | C2 (Acetylcarnitine)                       | 7.834  | 0.267 |
| Acylcarnitine | C3:1 (Propenoylcarnitine)                  | 0.051  | 0.002 |
| Acylcarnitine | C3 (Propionylcarnitine)                    | 0.272  | 0.009 |
| Acylcarnitine | C4:1 (Butenylcarnitine)                    | 0.018  | 0.000 |
| Acylcarnitine | C4 (butyrylcarnitine)                      | 0.193  | 0.008 |
| Acylcarnitine | C3-OH (hydroxyPropionylcarnitine)          | 0.028  | 0.001 |
| Acylcarnitine | C5:1 (Tiglylcarnitine)                     | 0.050  | 0.001 |
| Acylcarnitine | C5 (Valerylcarnitine)                      | 0.094  | 0.003 |
| Acylcarnitine | C4-OH (C3-DC) (Hydroxybutyrylcarnitine)    | 0.045  | 0.002 |
| Acylcarnitine | C6:1 (Hexenoylcarnitine)                   | 0.026  | 0.001 |
| Acylcarnitine | C6 (C4:1-DC) (Hexanoylcarnitine)           | 0.084  | 0.003 |
| Acylcarnitine | C5-OH (C3-DC-M) (hydroxyvalerylcarnitine)  | 0.035  | 0.001 |
| Acylcarnitine | C5:1-DC (Glutaconylcarnitine)              | 0.015  | 0.000 |
| Acylcarnitine | C5-DC (C6-OH)(Glutarylcarnitine)           | 0.015  | 0.000 |
| Acylcarnitine | C8 (Octanoylcarnitine)                     | 0.177  | 0.011 |
| Acylcarnitine | C5-M-DC (methylglutarylcarnitine)          | 0.025  | 0.001 |
| Acylcarnitine | C9 (Nonaylcarnitine)                       | 0.047  | 0.003 |
| Acylcarnitine | C7-DC (pimelylcarnitine)                   | 0.077  | 0.007 |
| Acylcarnitine | C10:2 (decadienylcarnitine)                | 0.059  | 0.002 |
| Acylcarnitine | C10:1 (Decenoylcarnitine)                  | 0.269  | 0.009 |
| Acylcarnitine | C10 (Decanoylcarnitine)                    | 0.469  | 0.029 |
| Acylcarnitine | C12:1 (Dodecenoylcarnitine)                | 0.007  | 0.000 |
| Acylcarnitine | C12 (dodecanoylcarnitine)                  | 0.110  | 0.006 |
| Acylcarnitine | C14:2 (Tetradecadienylcarnitine)           | 0.050  | 0.003 |
| Acylcarnitine | C14:1 (tetradecenoyl carnitine)            | 0.161  | 0.008 |
| Acylcarnitine | C14 (tetradecanoylcarnitine)               | 0.044  | 0.002 |
| Acylcarnitine | C12-DC (dodecanedioylcarnitine)            | 0.127  | 0.005 |
| Acylcarnitine | C14:2-OH (hydroxytetradecadienylcarnitine) | 0.013  | 0.000 |
| Acylcarnitine | C14:1-OH (Hydroxytetradecenoyl carnitine)  | 0.021  | 0.001 |
| Acylcarnitine | C16:2 (Hexadecadienylcarnitine)            | 0.013  | 0.001 |
| Acylcarnitine | C16:1 (Hexadecenoylcarnitine)              | 0.050  | 0.002 |

|               |                                           |       |       |
|---------------|-------------------------------------------|-------|-------|
| Acylcarnitine | C16 (Hexadecanoylcarnitine)               | 0.117 | 0.004 |
| Acylcarnitine | C16:2-OH (hydroxyhexadecadienylcarnitine) | 0.010 | 0.000 |
| Acylcarnitine | C16:1-OH (Hydroxyhexadecenoylcarnitine)   | 0.015 | 0.000 |
| Acylcarnitine | C16-OH (hydroxyhexadecanoylcarnitine)     | 0.009 | 0.000 |
| Acylcarnitine | C18:2 (Octadecadienylcarnitine)           | 0.056 | 0.002 |
| Acylcarnitine | C18:1 (Octadecenoylcarnitine)             | 0.159 | 0.005 |
| Acylcarnitine | C18 (Octadecanoylcarnitine)               | 0.048 | 0.002 |

Data presented as mean  $\pm$  standard error.
